# Supplementary material for: Notch-dependent expression of thearchipelagoubiquitin ligase subunit in theDrosophilaeye
Source: Oxford University Press journal article supplement (doi:10.1242/dev.054429), 2010-12-10
Supplement: dev054429tables1.pdf [file dev054429tables1.pdf]

**Table S1. Primer sequences**

| Primer                 | Sequence (5' to 3')                              |
|------------------------|--------------------------------------------------|
| <b>Sequencing</b>      |                                                  |
| ago 3' sense-seq       | TGTGCGTCTGTGTGTATGCAG                            |
| ago 3 antisense-seq    | CGCCGTAGGCAGAGATTGG                              |
| Gl1-sense-seq          | ATGTATCTTATGGTACTGTA ACTG                        |
| Gl2-antisense-seq      | CTTTATGTTTTTGGCGTCTTCCA                          |
| <b>Mutagenesis</b>     |                                                  |
| Su(H) site 1-sense     | TTGCGCCTGTATGTGAGACAGTGGGCCCAAAC                 |
| Su(H) site 1-antisense | GTTTGGGGCCCACTGTCTCACATACAGGCGCAA                |
| Su(H) site 2-sense     | GCGTATCGAAATGCGGAGTCAAAGCGGAGACCCTAA             |
| Su(H) site 2-antisense | TTAGGGTCTCCGCTTTGACTCCGCATTTTCGATACGC            |
| Su(H) site 3-sense     | GAAGCAGTAGAAGGAGGGAGGCAAGAGAATGAATACGAATA        |
| Su(H) site 3-antisense | TATTCGTATTCATTCTCTTGCCCTCCCTCCTTCTACTGCTTC       |
| Su(H) site 4-sense     | GGAAGAGAATGAATACGAATAAGGCAA AATGTTTCGGGAGAAATGCC |
| Su(H) site 4-antisense | GGCATTCTCCCGAACATTTTGCCTTATTCGTATTCATTCTCTTCC    |
| Su(H) site 5-sense     | GAGCAACGTCCTTAAAACGTAAGTCAAAAATTCGATTGAACGTGTG   |
| Su(H) site 5-antisense | CACACGTTCAATCGAATTTTTGACTTACGTTTTAAGGACGTTGCTC   |
| Su(H) site 6-sense     | CATCCCTAACTTAAGCCGTGAATTGCCTTGGTATATTTGAACG      |
| Su(H) site 6-antisense | CGTTCAAATATACCAAGGCAATTCACGGCTTAAGTTAGGGATG      |
